# Supplementary material
Source: PubMed Central journal article supplement (PMC3978395)
Supplement: neo1602_0147SD1.pdf [file neo1602_0147SD1.pdf]

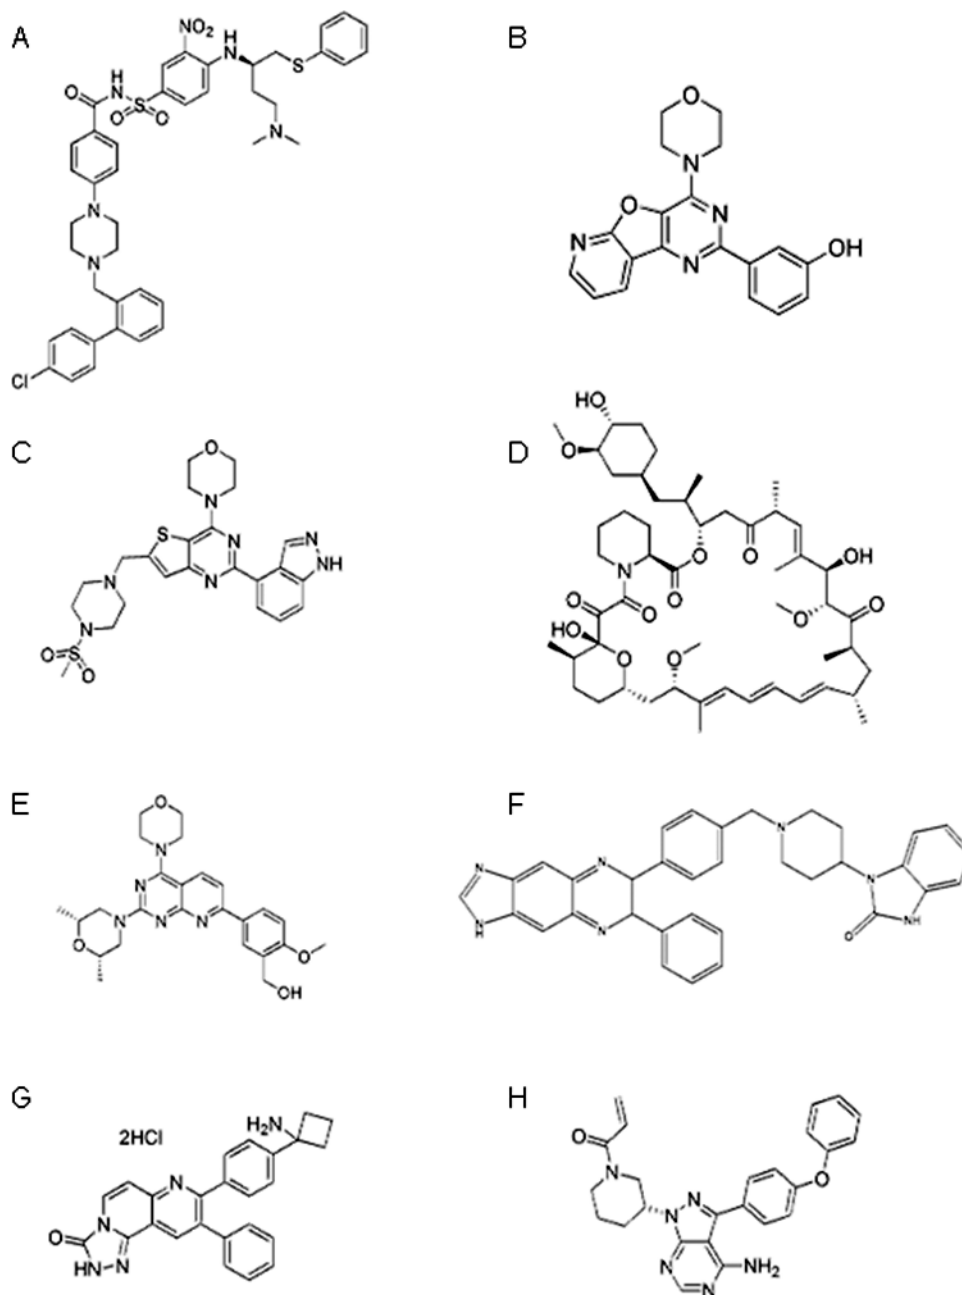

**Figure W1.** Structures of inhibitors used in study. (A) ABT-737, (B) PI-103, (C) GDC-0941, (D) rapamycin, (E) KU-0063794, (F) AKTi1/2, (G) MK-2206, and (H) PCI-32765.

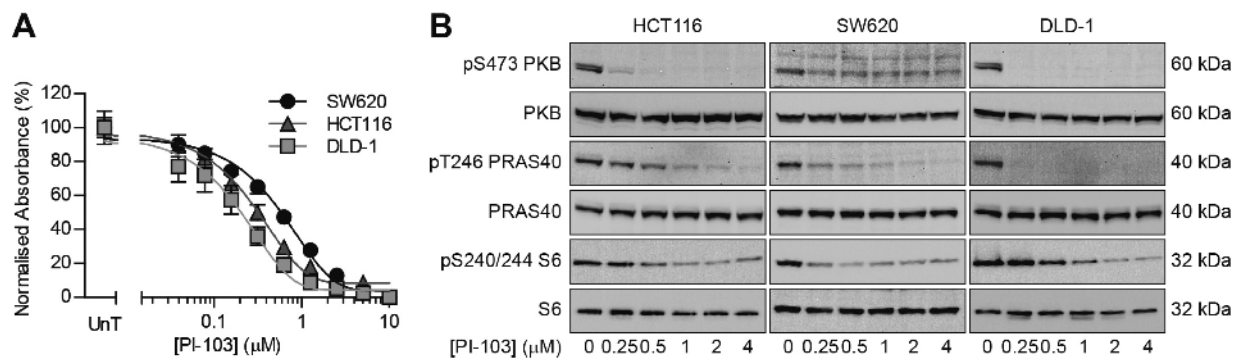

**Figure W2.** PI-103 inhibited cell proliferation and PI3K and mTOR signaling. (A) Cells were exposed to the indicated concentration of PI-103 for 3 days. Cells were fixed and stained with SRB, and the absorbance relative to untreated (UnT) cells was determined. Data represent the means of three independent experiments carried out in triplicate  $\pm$  SEM. (B) Cells were exposed to the indicated concentration of PI-103 for 4 hours, and the effect on level of pS473 PKB, total PKB, pT246 PRAS40, total PRAS40, pS240/244 S6, and total S6 was determined by Western blot analysis. Results are representative of three independent experiments.

**Table W1.** Effect of MCL-1 RNAi on ABT-737 GI<sub>50</sub>.

| Cell Line | Treatment*   | ABT-737 GI <sub>50</sub><br>(μM $\pm$ 95% CI) | Significance <sup>†</sup> |               |
|-----------|--------------|-----------------------------------------------|---------------------------|---------------|
|           |              |                                               | vs NT DMSO                | vs MCL-1 DMSO |
| HCT116    | NT DMSO      | 5.83 (5.39-6.31)                              |                           |               |
|           | NT PI-103    | 3.64 (3.20-4.15)                              | 0.0037                    |               |
|           | MCL-1 DMSO   | 3.07 (2.59-3.65)                              | 0.0027                    |               |
| SW620     | MCL-1 PI-103 | 1.90 (1.75-2.06)                              | <0.0001                   | 0.0079        |
|           | NT DMSO      | 18.0 (17.1-19.0)                              |                           |               |
|           | NT PI-103    | 3.54 (2.75-4.55)                              | 0.0002                    |               |
|           | MCL-1 DMSO   | 2.09 (1.76-2.48)                              | <0.0001                   |               |
|           | MCL-1 PI-103 | 0.71 (0.56-0.92)                              | <0.0001                   | 0.0022        |

The table relates to Figures 4B, C, and W6.

\*Cells were transfected with either nontargeting siRNA (NT) or MCL-1 targeting siRNA (MCL-1). Cells were also treated with 2 μM PI-103 or a DMSO equivalent.

<sup>†</sup>Two-tailed unpaired *t* test versus indicated treatment for the same cell line.

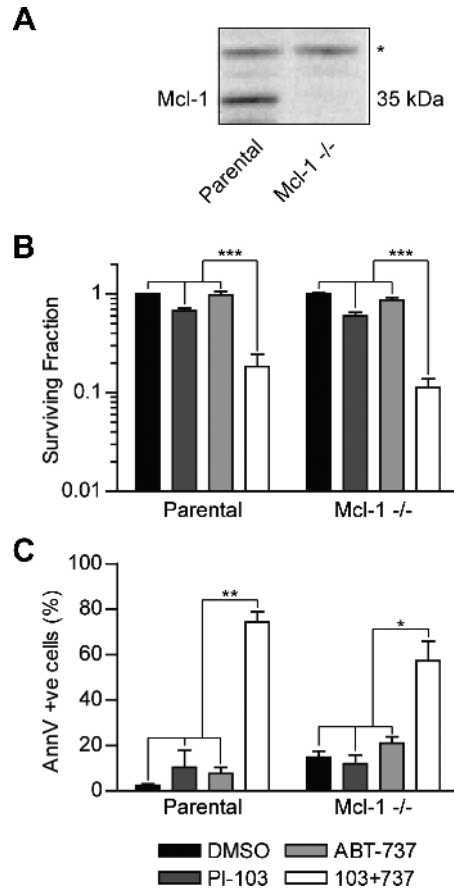

**Figure W3.** MCL-1<sup>-/-</sup> MEFs were sensitized to ABT-737-induced apoptosis by PI-103. (A) The level of MCL-1 in parental and MCL-1<sup>-/-</sup> MEFs was determined by Western blot analysis. \*, nonspecific background band that acts as a loading control. (B) Parental and MCL-1<sup>-/-</sup> MEFs seeded at a low density were exposed to 2  $\mu$ M PI-103 and/or 10  $\mu$ M ABT-737 (parental) or 0.15  $\mu$ M ABT-737 (MCL-1<sup>-/-</sup>) for 3 days. Drugs were removed, and cells were left for 1 week for colonies to form. The number of colonies were counted and expressed as a surviving fraction relative to DMSO control. (C) Parental and MCL-1<sup>-/-</sup> MEFs were exposed to the same concentrations of PI-103 and ABT-737 as in B for 24 hours and stained with APC-conjugated annexin V. All graphs represent the means of three independent experiments carried out in duplicate  $\pm$  SEM.

**Table W2.** Effect of PI3K Activity on ABT-737 GI<sub>50</sub>.

| Cell Line | PIK3CA Status | ABT-737 GI <sub>50</sub> ( $\mu$ M $\pm$ 95% CI) | Significance* |
|-----------|---------------|--------------------------------------------------|---------------|
| HCT116    | Parental      | 4.89 (4.55-5.24)                                 |               |
|           | Mutant        | 8.16 (7.18-9.26)                                 | 0.0023        |
| DLD-1     | Wild-type     | 3.40 (3.13-3.71)                                 | 0.0031        |
|           | Parental      | 7.92 (7.29-8.61)                                 |               |
|           | Mutant        | 6.97 (5.37-9.04)                                 | 0.4085        |
|           | Wild-type     | 3.76 (2.96-4.76)                                 | 0.0043        |

The table relates to Figure 3B.

\*Two-tailed unpaired *t* test versus GI<sub>50</sub> of parental cells for same cell line.

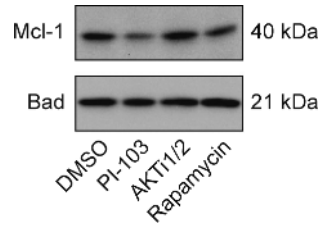

**Figure W4.** AKT and mTORC1 inhibition did not effect MCL-1 expression. HCT116 cells were treated with DMSO equivalent, 2  $\mu$ M PI-103, 1  $\mu$ M AKTi1/2, or 10 nM rapamycin for 24 hours, and the level of MCL-1 and Bad was determined by Western blot analysis.

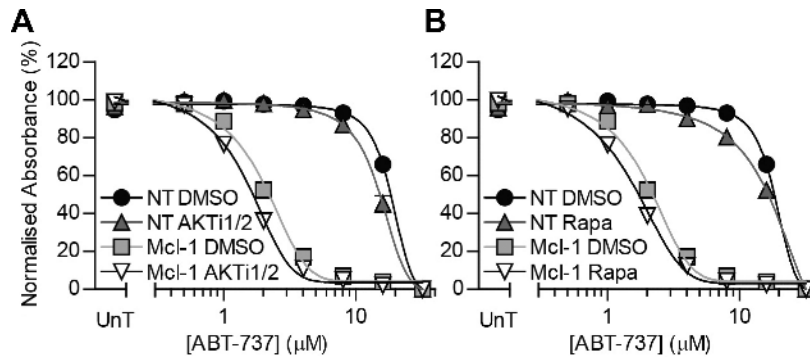

**Figure W5.** Neither AKTi1/2 nor rapamycin further sensitized MCL-1 knockdown SW620 cells to ABT-737. SW620 cells were transfected with NT RNAi or MCL-1 RNAi and plated for experiments 24 hours later. Cells were treated with 1  $\mu$ M AKTi1/2 (A), 10 nM rapamycin (Rapa; B), or DMSO equivalent and the indicated concentration of ABT-737 for 3 days and processed as in Figure 1A. All graphs represent the means of three independent experiments carried out in triplicate  $\pm$  SEM.

**Table W3.** Effect of MCL-1 RNAi on ABT-737 GI<sub>50</sub>.

| Cell Line | Treatment*      | ABT-737 GI <sub>50</sub><br>( $\mu$ M $\pm$ 95% CI) | Significance <sup>†</sup> |                      |
|-----------|-----------------|-----------------------------------------------------|---------------------------|----------------------|
|           |                 |                                                     | <i>vs</i> NT DMSO         | <i>vs</i> MCL-1 DMSO |
| SW620     | NT DMSO         | 17.7 (17.3-18.2)                                    |                           |                      |
|           | NT AKTi1/2      | 15.1 (13.0-17.7)                                    | 0.12                      |                      |
|           | NT rapamycin    | 16.2 (14.5-18.1)                                    | 0.20                      |                      |
|           | MCL-1 DMSO      | 2.1 (1.8-2.5)                                       | <0.0001                   |                      |
|           | MCL-1 AKTi1/2   | 1.6 (1.3-2.0)                                       | <0.0001                   | 0.11                 |
|           | MCL-1 rapamycin | 1.6 (1.3-2.1)                                       | <0.0001                   | 0.17                 |

The table relates to Figure W5.

\*Cells were transfected with either nontargeting siRNA (NT) or MCL-1 targeting siRNA (MCL-1). Cells were also treated with 1  $\mu$ M AKTi1/2 or 10 nM rapamycin or a DMSO equivalent.

<sup>†</sup>Two-tailed unpaired *t* test *versus* indicated treatment for the same cell line.

**Table W4.** Results of siRNA Screen.

| siRNA SMARTpool | Robust Z Score | P Value  |
|-----------------|----------------|----------|
| MCL1            | -4.669         | 4.66E-15 |
| SOS1            | -1.348         | .018     |
| PLEKHB2         | -1.213         | .030     |
| BMX             | -1.080         | .002     |
| SGK1            | -0.944         | .006     |
| PIK3R2          | -0.915         | .074     |
| AKT1            | -0.746         | .114     |
| PHLDB3          | -0.718         | .013     |
| PLEKHA2         | -0.706         | .089     |
| SGK3            | -0.649         | .032     |
| PIK3CD          | -0.619         | .067     |
| AKT2            | -0.535         | .147     |
| MCF2            | -0.488         | .261     |
| DAPP1           | -0.484         | .156     |
| FGD6            | -0.456         | .067     |
| PREX2           | -0.444         | .054     |
| ARAP3           | -0.393         | .149     |
| VAV2            | -0.382         | .127     |
| VAV1            | -0.359         | .140     |
| ARHGEF4         | -0.338         | .183     |
| DOCK1           | -0.311         | .336     |
| GSK3B           | -0.290         | .163     |
| PLEKHA1         | -0.250         | .216     |
| TIAM1           | -0.224         | .206     |
| PHLDB1          | -0.197         | .249     |
| ADAP2           | -0.186         | .305     |
| MTOR            | -0.169         | .320     |
| GAB3            | -0.141         | .355     |
| PIK3CA          | -0.127         | .419     |
| ARAP1           | -0.119         | .434     |
| SH3BP2          | -0.079         | .651     |
| NT              | -0.077         | .539     |
| SGK2            | -0.056         | .497     |
| ARHGAP1         | -0.055         | .541     |
| ADAP1           | -0.045         | .632     |
| RASA2           | -0.043         | .552     |
| VAV3            | -0.025         | .559     |
| GSK3A           | 0.015          | .726     |
| SBF1            | 0.023          | .733     |
| PLCXD2          | 0.029          | .732     |
| CYTH4           | 0.031          | .716     |
| PLEK2           | 0.032          | .758     |
| ITK             | 0.046          | .851     |
| TEC             | 0.049          | .796     |
| PTPN9           | 0.067          | .833     |
| GAB1            | 0.078          | .848     |
| ARHGEF6         | 0.080          | .865     |
| SWAP70          | 0.083          | .924     |
| GAB2            | 0.084          | .879     |
| RASA3           | 0.131          | .995     |
| PREX1           | 0.167          | .890     |
| RICTOR          | 0.223          | .830     |
| PDPK1           | 0.224          | .773     |
| DOCK2           | 0.230          | .712     |
| CYTH2           | 0.301          | .519     |
| AKT3            | 0.303          | .580     |
| CYTH1           | 0.318          | .498     |
| ARAP2           | 0.345          | .482     |
| MYO10           | 0.482          | .426     |
| RASA1           | 0.572          | .133     |
| CYTH3           | 0.612          | .201     |
| BTK             | 0.751          | .104     |
| RPTOR           | 0.825          | .075     |
| AKAP13          | 0.861          | .013     |
| PLCL2           | 1.015          | .008     |
| PIK3R1          | 1.404          | .001     |
| PIK3CB          | 1.571          | .002     |

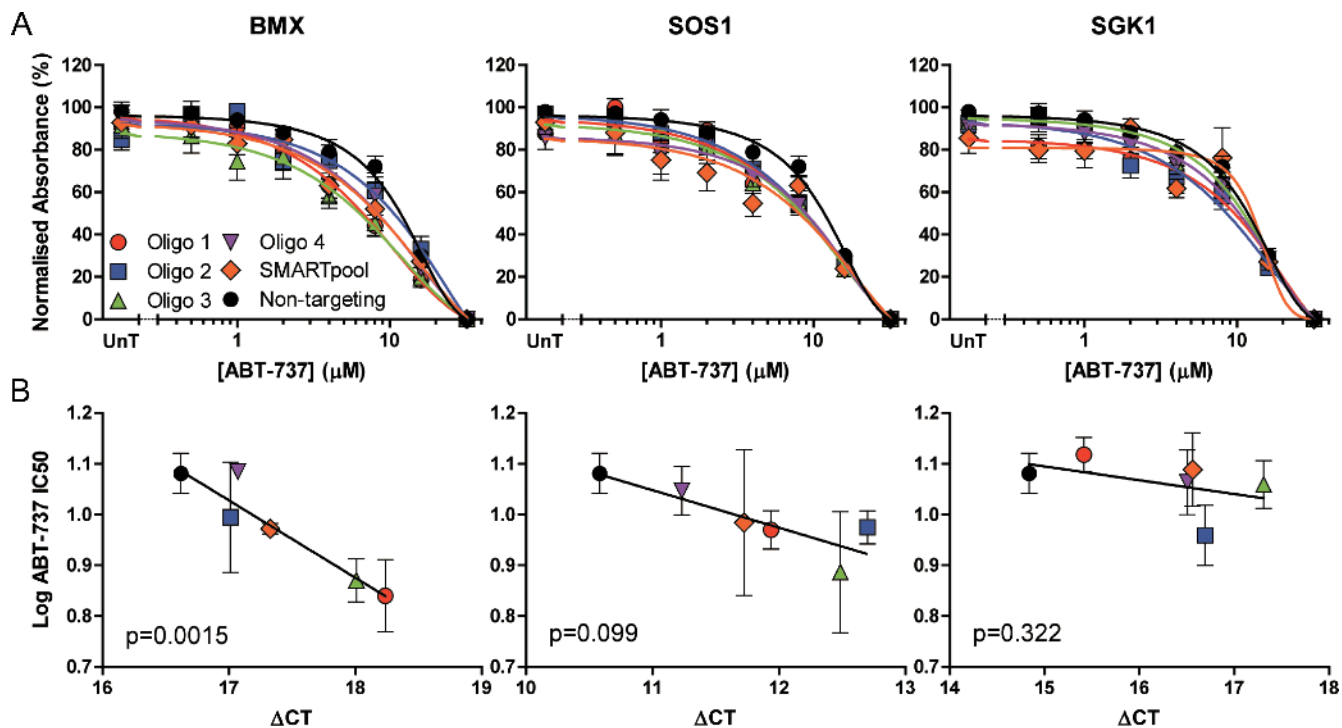

**Figure W6.** Deconvolution of BMX, SOS1, and SGK1 SMARTpool. SW620 cells were transfected with nontargeting siRNA, SMARTpool siRNA, or individual oligos targeting BMX, SOS1, or SGK1, and an ABT-737 concentration response was carried out, or the appropriate mRNA level was determined by qPCR. (A and B) A shows the concentration response curves, and B shows the correlation between knock-down efficiency and ABT-737 efficacy. All graphs represent the means of three independent experiments carried out in triplicate  $\pm$  SEM.

**Table W5.** ABT-737  $GI_{50}$  from Deconvolved siRNA Transfection.

| RNAi Target  | Oligo     | ABT-737 $GI_{50}$ ( $\mu M \pm 95\%$ CI) | Significance* |
|--------------|-----------|------------------------------------------|---------------|
| Nontargeting | SMARTpool | 12.04 (10.07-14.10)                      |               |
| BMX          | 1         | 6.92 (5.02-9.52)                         | 0.041         |
|              | 2         | 9.87 (6.06-16.08)                        | 0.496         |
|              | 3         | 7.42 (6.13-8.99)                         | 0.022         |
|              | 4         | 8.80 (4.68-16.56)                        | 0.402         |
| SOS1         | SMARTpool | 9.38 (8.95-9.83)                         | 0.057         |
|              | 1         | 9.33 (7.87-11.06)                        | 0.113         |
|              | 2         | 9.42 (8.16-10.91)                        | 0.107         |
|              | 3         | 7.70 (4.49-13.20)                        | 0.198         |
| SGK1         | 4         | 11.13 (8.98-13.81)                       | 0.613         |
|              | SMARTpool | 9.64 (5.04-18.44)                        | 0.552         |
|              | 1         | 13.11 (11.26-15.26)                      | 0.516         |
|              | 2         | 9.10 (6.96-11.89)                        | 0.163         |
|              | 3         | 11.46 (9.26-14.17)                       | 0.744         |
|              | 4         | 11.58 (8.69-15.44)                       | 0.832         |
|              | SMARTpool | 12.25 (8.85-16.96)                       | 0.931         |

The table relates to Figures 4, B and C, and W4.

\*Two-tailed unpaired *t* test versus nontargeting siRNA ABT-737  $GI_{50}$ .

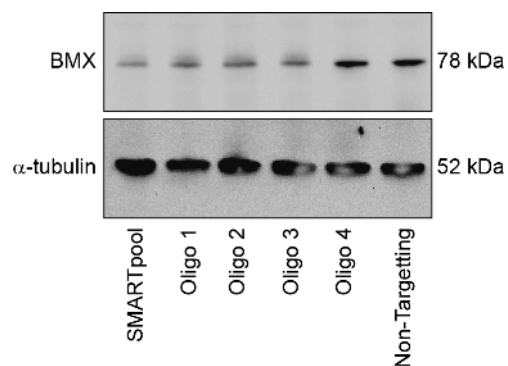

**Figure W7.** BMX RNAi reduced levels of BMX protein. SW620 cells were transfected with BMX siRNA SMARTpool, individual BMX siRNA oligos, or nontargeting control siRNA SMARTpool. After 48 hours, cells were harvested, and the level of BMX was assayed by Western blot analysis. Tubulin was used as a loading control. Blots are representative of three independent experiments.

**Table W6.** ABT-737 GI<sub>50</sub> from HCT116 BMX RNAi.

| RNAi Target  | ABT-737 GI <sub>50</sub> (μM ± 95% CI) | Significance* |
|--------------|----------------------------------------|---------------|
| Nontargeting | 5.32 (4.40-6.43)                       |               |
| BMX          | 2.94 (2.83-3.05)                       | 0.027         |
| MCL-1        | 1.70 (1.28-2.24)                       | 0.022         |

The table relates to Figure 4D.

\*Two-tailed unpaired *t* test versus nontargeting siRNA ABT-737 GI<sub>50</sub>.

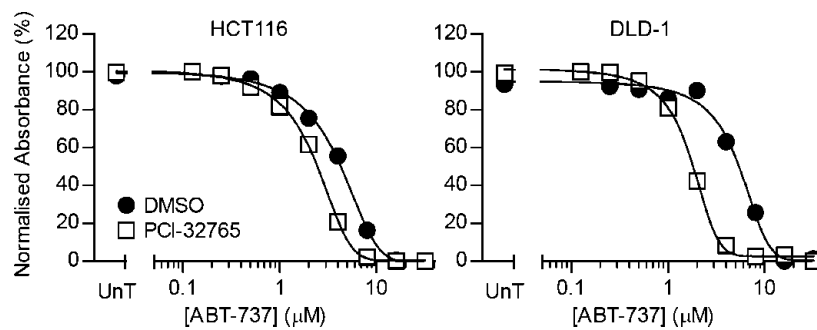

**Figure W8.** PCI-32765 increased the sensitivity of HCT116 and DLD-1 cells to ABT-737. HCT116 and DLD-1 cells were treated with 4 μM PCI-32765 or DMSO equivalent and the indicated concentration of ABT-737 for 3 days and processed as in Figure 1A. All graphs represent the means of three independent experiments carried out in triplicate. SEM error bars are not visible due to being smaller than the symbols.

**Table W7.** ABT-737 GI<sub>50</sub> from SW620, HCT116 and DLD-1 PCI-32765 Treatment.

| Cell Line | Treatment      | ABT-737 GI <sub>50</sub> (μM ± 95% CI) | Significance* |
|-----------|----------------|----------------------------------------|---------------|
| SW620     | DMSO           | 10.8 (10.3-11.2)                       |               |
|           | 4 μM PCI-32765 | 6.4 (5.9-6.9)                          | 0.0005        |
| HCT116    | DMSO           | 4.2 (3.8-4.7)                          |               |
|           | 4 μM PCI-32765 | 2.3 (2.0-2.7)                          | 0.005         |
| DLD-1     | DMSO           | 5.4 (5.1-5.8)                          |               |
|           | 4 μM PCI-32765 | 1.8 (1.7-1.8)                          | >0.0001       |

The table relates to Figures 4E and W8.

\*Two-tailed unpaired *t* test versus nontargeting DMSO-treated ABT-737 GI<sub>50</sub>.

**Table W8.** ABT-737 GI<sub>50</sub> from SW620 BMX RNAi +/- PI-103.

| Treatment*         | ABT-737 GI <sub>50</sub> (μM ± 95% CI) | Significance <sup>†</sup> |                     |
|--------------------|----------------------------------------|---------------------------|---------------------|
|                    |                                        | <i>vs</i> NT DMSO         | <i>vs</i> NT PI-103 |
| NT DMSO            | 15.4 (14.3-16.6)                       |                           |                     |
| NT PI-103          | 3.79 (3.02-4.76)                       | 0.0003                    |                     |
| BMX oligo 1 DMSO   | 8.0 (7.2-8.87)                         | 0.0006                    |                     |
| BMX oligo 1 PI-103 | 2.93 (2.4-3.57)                        | 0.0001                    | 0.171               |

The table relates to Figure 4F.

\*Cells were transfected with either nontargeting siRNA (NT) or BMX oligo 1. Cells were also treated with 2 μM PI-103 or a DMSO equivalent.

<sup>†</sup>Two-tailed unpaired *t* test *versus* indicated treatment for the same cell line.

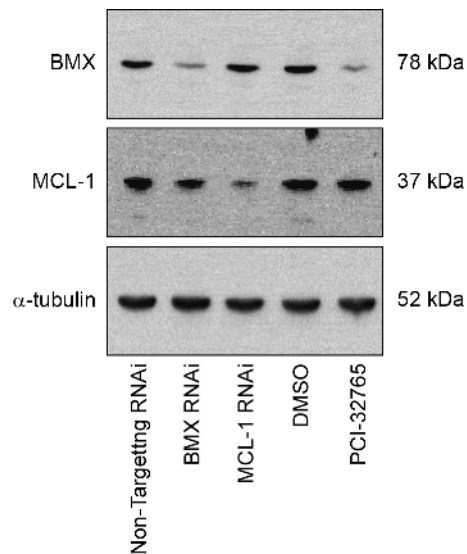

**Figure W9.** Neither BMX RNAi nor inhibition affected levels of MCL-1. SW620 cells were transfected with nontargeting siRNA, BMX siRNA, or MCL-1 siRNA SMARTpool and harvested 48 hours later to be treated with 4 μM PCI-32765 or DMSO equivalent and harvested 24 hours later. The level of BMX and MCL-1 was assayed by Western blot analysis. Tubulin was used as a loading control. Blots are representative of three independent experiments.
